# Supplementary material for: Effect of a Low-Glycemic Load Diet Intervention on Maternal and Pregnancy Outcomes in Obese Pregnant Women
Source: PubMed Central journal article supplement (PMC7996780; doi:10.3390/nu13030748), 2021-02-26
Supplement: nutrients-13-00748-s001.pdf [file nutrients-13-00748-s001.pdf]

**Supplemental Table 1:** Distribution of the variables considered for propensity score calculation

|                                             | <b>Study participants</b><br>n=47<br>mean (SD) | <b>controls</b><br>n=47<br>mean (SD) | <b>p</b><br>for<br>difference* |
|---------------------------------------------|------------------------------------------------|--------------------------------------|--------------------------------|
| <b>Age, years</b>                           | 29.6 (5.21)                                    | 29.3 (4.88)                          | 0.6                            |
| <b>BMI study baseline, kg/m<sup>2</sup></b> | 33.2 (5.52)                                    | 32.4 (4.49)                          | 0.4                            |
| <b>Parity</b>                               | 1 (1, 2)                                       | 1 (1, 2)                             | 0.9                            |
| <b>Family history of diabetes, n (%)</b>    | 25 (53.2%)                                     | 27 (57.5%)                           | 0.7                            |

\* paired t-test
